# Supplementary material for: Directed differentiation of human iPSCs to functional ovarian granulosa-like cells via transcription factor overexpression
Source: eLife journal article supplement (doi:10.7554/elife.83291), 2023-01-19
Supplement: fig3-data1 [file markers_2022-10-02.xlsx]

## Sheet: granulosa
ensembl_gene_id	hgnc_symbol	hESC	PreME	ME	DE	Soma_wk7_M	tdT_mean	COV434_mean	iPSC_mean	granulosa_mean	granulosa_primordial_mean	qval_iPSC_vs_tdT	qval_COV434_vs_tdT	qval_COV434_vs_iPSC	gonad_tpm
ENSG00000128918	ALDH1A2	2.29121	2.17422	5.51794	1.40672	10.2571	5.09774	0.27825	0.168475	1.27174	1.69838	3.82549e-06	4.41384e-05		6.64288
ENSG00000135409	AMHR2	0	0	3.03751	6.02279	9.90311	4.07654	0.125927	0.0597435	2.45456	2.51674	5.60743e-07	5.89762e-07		6.29252
ENSG00000085117	CD82	2.65799	0	1.02066	1.18558	5.1848	4.52496	1.74218	3.20504	2.82153	4.90463	0.0390242	0.00165877	0.0272576	1.94932
ENSG00000170558	CDH2	10.5086	11.8043	13.1366	14.2545	10.6738	6.4925	1.94345	5.48416	2.57541	0.917516	0.0451437	2.63308e-06	9.29626e-06	7.05618
ENSG00000108821	COL1A1	9.39331	8.36618	8.1165	11.1979	13.1372	8.8692	1.37814	4.87482	1.21507	0.852039	0.000247411	7.50497e-11	0.0171053	9.51137
ENSG00000107562	CXCL12	9.7882	9.93416	8.52019	5.8379	11.6338	5.81105	0.237588	5.87336	0.358847	0.439883	0.00417362	3.46216e-08	6.17913e-09	8.01134
ENSG00000183770	FOXL2	1.644	0	0	1.66554	3.61674	3.72226	0	1.08313	3.31189	4.17127	0.000542064	0.000178336	0.00461155	0.934775
ENSG00000170820	FSHR	2.10597	2.17422	6.32801	7.35503	4.41312	0.361431	0	0	0.598306	0.384592				1.40207
ENSG00000167244	IGF2	4.37206	2.73503	2.35546	7.18276	13.5071	11.1559	5.17414	2.06769	0.803348	1.03706	6.38517e-14	5.04895e-14	0.000443188	9.88089
ENSG00000163453	IGFBP7	6.6303	6.80157	7.05927	6.21335	8.92479	8.80597	9.45013	1.22957	6.26776	2.27032	0.000866233	0.000444388	4.84981e-05	5.33052
ENSG00000171345	KRT19	6.83052	5.32555	6.09714	8.8161	7.22726	7.08353	0.0288479	6.72653	1.37947	2.59249	0.117575	0.000119092	0.000240236	3.70509
ENSG00000143355	LHX9	0	0	1.02066	4.17478	10.9489	0.291956	0.411274	0.0238899	0.012767	0.10391		0.0615311	0.0430997	7.32961
ENSG00000124920	MYRF	5.85214	5.93928	5.91215	8.70432	11.1243	3.43101	1.04665	1.38207	0.851046	1.06579	0.0241403	0.000770734	0.511098	7.50399
ENSG00000185551	NR2F2	0	1.29849	1.02066	5.32476	12.5911	6.49076	7.46567	0.185495	1.85214	1.2325	1.93703e-07	4.01262e-05	5.55984e-09	8.96618
ENSG00000136931	NR5A1	0	0	0	2.32116	9.06258	11.2967	0.110627	1.63362	0.703453	0	1.74291e-05	3.99258e-14		5.46531
ENSG00000169218	RSPO1	0	0	0	0	8.40027	0.772969	0.0991578	0.0565164	0.033443	0	0.0231485	0.0105591		4.82038
ENSG00000147465	STAR	4.18819	4.04952	2.49365	6.22906	10.5814	7.83843	0.0946126	1.61275	3.68477	4.0085	8.61937e-07	1.69336e-09	0.00207746	6.96442
ENSG00000118526	TCF21	1.12404	0	0	0	8.19776	9.41406	0.0316317	1.00495	0.88758	0.835625	0.00011386	6.47712e-06	0.0343334	4.62492
ENSG00000026025	VIM	9.77931	10.23	11.6288	11.473	11.8009	10.1155	3.62586	5.68906	8.95951	9.26342	1.45669e-07	3.15937e-14	0.248508	8.17791
ENSG00000162552	WNT4	5.27208	5.52325	5.78333	6.88152	7.64085	2.37784	0.340776	0.346231	0.0375731	0.00074524	0.000806999	0.00148683	0.113055	4.09311
ENSG00000184937	WT1	0	0.790654	4.32531	0.632681	12.1845	0.341027	7.85071	0.0374762	2.24823	2.29388		3.20187e-33	9.23205e-33	8.56037

## Sheet: male
ENSG00000125398	SOX9	7.47676	6.07936	8.40228	3.80205	7.3365	7.23028	6.70457	5.59626	11.2687	3.25884	3.95149	0.12707	0.162808	2.54141	1.30801	3.60517	0.144939	1.92471	1.68046	3.46023	-1.77977	0.0989524	0.000140377	0.00553463	1.08297	0.924973	-7.66352	2.5222	3.46023	2.6802	0.999102
ENSG00000137090	DMRT1	1.644	1.6318	2.49478	1.29173	2.89399	0.988146	8.72872	7.32271	8.03296	0.0656124	0.0809954	0	0	0.10008	0	0.0733039	0	0.0500401	0.0232639	0.0733039	-0.0500401				0.0154729	0	-7.95966	0.057831	0.0733039	0.0733039	-7.75522

## Sheet: adrenal
ENSG00000148053	NTRK2	1.12404	2.55644	2.03166	3.01736	9.53663	0.762712	2.68585	0.0742701	0.717279	0.832142	0.068536	0.00760892	1.22478e-06
ENSG00000164920	OSR2	1.46955	1.29849	1.34856	1.071	4.97035	0.718072	2.22868	0.406149	0.385172	1.01576	0.111267	0.00631083	0.000903342

## Sheet: pluripotent
ENSG00000039068	CDH1	11.1337	11.2048	10.406	8.93021	6.30677	3.34117	1.2117	7.08582	0.592869	0.279588	3.9753e-06	0.0159488	7.36727e-07
ENSG00000181449	SOX2	10.8812	9.81024	7.80681	2.94862	0.587969	1.25967	0.919988	7.82355	0.123104	0.0614402	4.28517e-05	0.0875599	1.17131e-05
ENSG00000111704	NANOG	9.6615	10.2241	8.64378	7.54707	6.36308	0.603438	0.121149	8.20309	0.447774	0.0502812	8.00746e-10	0.0736359	1.2371e-11

## Sheet: Sheet1
Gene_name	FOXL2+_1	FOXL2+_2	COV434_1	COV434_2	iPSC_1	iPSC_2	KGN_1	KGN_2	Gonad_wk7_M_1	Gonad_wk7_M_2	Gonad_wk7_F_1	Gonad_wk7_F_2	Gonad_wk7_F_3		Gene_name	Gonad_wk7_M	Gonad_wk7_F	FOXL2_tdT+	KGN	COV434	iPSC
ALDH1A2	4.83167	5.36381	0.382187	0.174314	0.0243449	0.312605	1.71217	0	6.18281	5.96208	5.84966	5.64465	5.94267		ALDH1A2	6.07244	5.81232	5.09774	0.856083	0.27825	0.168475
AMHR2	5.10531	3.04777	0.251854	0	0	0.119487	3.95682	3.68878	6.2317	6.33145	6.74487	6.51311	6.48594		AMHR2	6.28158	6.5813	4.07654	3.8228	0.125927	0.0597435
CD82	4.49557	4.55434	1.75563	1.72873	3.10678	3.30331	6.53838	6.58772	2.27757	2.63508	2.53566	2.15889	2.37049		CD82	2.45632	2.35501	4.52496	6.56305	1.74218	3.20504
CDH2	7.07654	5.90845	1.76736	2.11954	5.35989	5.60843	7.09253	7.00243	5.76354	6.05081	5.57848	5.47277	5.86814		CDH2	5.90718	5.6398	6.4925	7.04748	1.94345	5.48416
COL1A1	8.35303	9.38537	1.504	1.25228	3.13356	6.61608	11.8574	11.6056	7.84768	7.86106	7.31004	8.0745	8.59444		COL1A1	7.85437	7.993	8.8692	11.7315	1.37814	4.87482
CXCL12	5.62309	5.99901	0.256458	0.218718	5.87177	5.87495	1.22184	1.74772	7.4968	6.98459	6.08966	6.16009	6.6806		CXCL12	7.24069	6.31012	5.81105	1.48478	0.237588	5.87336
FOXL2	3.62167	3.82286	0	0	0.906765	1.25949	5.38854	5.18833	0.694408	0.250285	2.19773	2.64978	0.667443		FOXL2	0.472346	1.83832	3.72226	5.28844	0	1.08313
FSHR	0.508806	0.214055	0	0	0	0	3.05435	3.09795	1.05773	0.94658	0.53029	1.57525	0		FSHR	1.00215	0.701846	0.361431	3.07615	0	0
IGF2	11.0628	11.2489	5.86077	4.48751	1.26911	2.86627	0.158128	0.353399	8.3386	8.76893	8.85385	9.42155	9.70677		IGF2	8.55376	9.32739	11.1559	0.255763	5.17414	2.06769
IGFBP7	8.92244	8.6895	9.19769	9.70258	0.208675	2.25046	11.356	11.3201	6.17096	5.84352	4.67379	4.36863	4.70224		IGFBP7	6.00724	4.58155	8.80597	11.338	9.45013	1.22957
KRT19	7.07119	7.09587	0	0.0576958	6.38903	7.06403	5.66106	5.61835	3.26327	4.28265	4.68416	4.07114	4.48907		KRT19	3.77296	4.41479	7.08353	5.63971	0.0288479	6.72653
LHX9	0.583911	0	0.331002	0.491546	0.0477797	0	2.94422	2.97823	6.50876	7.1151	7.07509	6.7176	6.89197		LHX9	6.81193	6.89489	0.291956	2.96122	0.411274	0.0238899
MYRF	4.47958	2.38244	0.918199	1.1751	0.954919	1.80922	6.52082	6.39636	5.7536	6.20166	6.05004	5.66355	6.04857		MYRF	5.97763	5.92072	3.43101	6.45859	1.04665	1.38207
NR2F2	5.86018	7.12133	7.35768	7.57366	0	0.37099	5.9834	5.94499	7.89831	7.88915	8.32471	8.1986	8.19932		NR2F2	7.89373	8.24087	6.49076	5.96419	7.46567	0.185495
NR5A1	11.2396	11.3538	0	0.221253	0.388507	2.87874	5.84644	5.55748	4.49792	4.41872	3.85134	4.24498	4.01148		NR5A1	4.45832	4.03593	11.2967	5.70196	0.110627	1.63362
RSPO1	0.600991	0.944946	0.0709219	0.127394	0.0324918	0.080541	0	0.182718	4.2286	4.18759	4.33171	4.52237	4.5188		RSPO1	4.2081	4.45763	0.772969	0.0913589	0.0991578	0.0565164
STAR	8.10611	7.57074	0.138091	0.0511343	1.10667	2.11883	7.04013	7.13524	6.37117	6.08149	6.01195	5.92253	6.24187		STAR	6.22633	6.05879	7.83843	7.08768	0.0946126	1.61275
TCF21	9.50375	9.32437	0	0.0632634	0.533822	1.47608	0	0	4.67387	4.38414	3.94043	4.30783	3.70405		TCF21	4.52901	3.98411	9.41406	0	0.0316317	1.00495
VIM	10.0428	10.1883	3.9333	3.31842	3.94607	7.43205	12.7618	12.706	8.10312	8.26154	8.63691	9.06893	8.4324		VIM	8.18233	8.71275	10.1155	12.7339	3.62586	5.68906
WNT4	2.17853	2.57715	0.375168	0.306384	0.208151	0.484311	0.0799746	0.0575501	3.08244	3.21819	2.33457	2.66911	2.48449		WNT4	3.15032	2.49606	2.37784	0.0687623	0.340776	0.346231
WT1	0.339389	0.342664	7.78592	7.91549	0.0749524	0	0.0872036	0	7.85977	8.34041	8.23095	8.12697	8.28924		WT1	8.10009	8.21572	0.341027	0.0436018	7.85071	0.0374762
NTRK2	0.484717	1.04071	2.26084	3.11086	0.0774165	0.0711237	3.45507	3.41125	3.45311	3.92263	4.28344	4.75363	4.25678
OSR2	0.50546	0.930683	2.22833	2.22904	0.0513875	0.76091	1.20129	1.20235	1.99348	1.52127	2.50447	4.71409	3.06457		NTRK2	3.68787	4.43128	0.762712	3.43316	2.68585	0.0742701
SOX2	1.03967	1.47967	0.839241	1.00074	7.80153	7.84557	0	0	0.104429	0	0	0.450663	0.491775		OSR2	1.75737	3.42771	0.718072	1.20182	2.22868	0.406149
NANOG	0.453416	0.75346	0.20181	0.0404874	8.77699	7.62919	0.233787	0.30406	4.80863	3.69216	2.62836	2.88562	3.10074
POU5F1	3.62318	4.79813	0.607049	0.616524	11.3071	10.9143	0.222367	0	2.53166	2.32223	2.76828	2.51636	2.88012		SOX2	0.0522146	0.314146	1.25967	0	0.919988	7.82355
															NANOG	4.25039	2.87157	0.603438	0.268923	0.121149	8.20309
															POU5F1	2.42695	2.72159	4.21066	0.111183	0.611786	11.1107

## Sheet: heatmap
		Gonad / Granulosa	Gonad_wk7_M	Gonad_wk7_F	primary_GC	primordial_GC	FOXL2_tdT+	KGN	COV434	iPSC
		ALDH1A2	6.07244	5.81232	1.27174	1.69838	5.09774	0.856083	0.27825	0.168475
		AMHR2	6.28158	6.5813	2.45456	2.51674	4.07654	3.8228	0.125927	0.0597435
		CD82	2.45632	2.35501	2.82153	4.90463	4.52496	6.56305	1.74218	3.20504
		CDH2	5.90718	5.6398	2.57541	0.917516	6.4925	7.04748	1.94345	5.48416
		COL1A1	7.85437	7.993	1.21507	0.852039	8.8692	11.7315	1.37814	4.87482
		CXCL12	7.24069	6.31012	0.358847	0.439883	5.81105	1.48478	0.237588	5.87336
		FOXL2	0.472346	1.83832	3.31189	4.17127	3.72226	5.28844	0	1.08313
		FSHR	1.00215	0.701846	0.598306	0.384592	0.361431	3.07615	0	0
		IGF2	8.55376	9.32739	0.803348	1.03706	11.1559	0.255763	5.17414	2.06769
		IGFBP7	6.00724	4.58155	6.26776	2.27032	8.80597	11.338	9.45013	1.22957
		KRT19	3.77296	4.41479	1.37947	2.59249	7.08353	5.63971	0.0288479	6.72653
		LHX9	6.81193	6.89489	0.012767	0.10391	0.291956	2.96122	0.411274	0.0238899
		MYRF	5.97763	5.92072	0.851046	1.06579	3.43101	6.45859	1.04665	1.38207
		NR2F2	7.89373	8.24087	1.85214	1.2325	6.49076	5.96419	7.46567	0.185495
		NR5A1	4.45832	4.03593	0.703453	0	11.2967	5.70196	0.110627	1.63362
		RSPO1	4.2081	4.45763	0.033443	0	0.772969	0.0913589	0.0991578	0.0565164
		STAR	6.22633	6.05879	3.68477	4.0085	7.83843	7.08768	0.0946126	1.61275
		TCF21	4.52901	3.98411	0.88758	0.835625	9.41406	0	0.0316317	1.00495
		VIM	8.18233	8.71275	8.95951	9.26342	10.1155	12.7339	3.62586	5.68906
		WNT4	3.15032	2.49606	0.0375731	0.00074524	2.37784	0.0687623	0.340776	0.346231
		WT1	8.10009	8.21572	2.24823	2.29388	0.341027	0.0436018	7.85071	0.0374762
		Adrenal
		NTRK2	3.68787	4.43128	0.717279	0.832142	0.762712	3.43316	2.68585	0.0742701
		OSR2	1.75737	3.42771	0.385172	1.01576	0.718072	1.20182	2.22868	0.406149
		Pluripotent
		SOX2	0.0522146	0.314146	0.123104	0.0614402	1.25967	0	0.919988	7.82355
		NANOG	4.25039	2.87157	0.447774	0.0502812	0.603438	0.268923	0.121149	8.20309
		POU5F1	2.42695	2.72159	0.238589	0.0619162	4.21066	0.111183	0.611786	11.1107
