# Supplementary material for: Directed differentiation of human iPSCs to functional ovarian granulosa-like cells via transcription factor overexpression
Source: eLife journal article supplement (doi:10.7554/elife.83291), 2023-01-19
Supplement: fig3-figsupp1-data1 [file elife-83291-fig3-figsupp1-data1-v1.zip]

## Sheet: Sheet1
	TFs	Clone	EPCAM– CD82+	EPCAM+ CD82–	Estradiol ng/mL	AMHR2 ∆∆Ct vs GAPDH
	NR5A1 RUNX1	1	0.248918	0.239487	5.02885	-3.67391
		2	0.171192	0.104232	3.67011
		3	0.527679	0.046994	0.0913716	-4.32416
		4	0.0950171	0.273421	5.22861
		5	0.105135	0.293194	4.61353
		6	0.0268383	0.413511	3.37245
		7	0.363626	0.104872	2.92636	-9.17018
	NR5A1 RUNX2	1	0.526599	0.0754413	0.0859157	-8.72951
		2	0.0844803	0.297639	3.00302
		3	0.602038	0.146031	3.77837	-4.88849
		4	0.495411	0.0674808	0	-7.2777
		5	0.282478	0.265877	4.0103
		6	0.78694	0.0178391	0.025916	-3.56266
		7	0.103149	0.33716	4.87779
	NR5A1 RUNX1 GATA4	1	0.229755	0.216512	0.569458
		2	0.697572	0.0184407	0.0142062	-4.7025
		3	0.570236	0.0190994	0.401845	-2.02707
		4	0.123475	0.319321	0.285735
		5	0.336615	0.173538	0.0126194
		6	0.0799083	0.206001	4.03743	-9.27885
		7	0.224107	0.221902	0.394438
	NR5A1 RUNX1 GATA4 FOXL2	1	0.157629	0.362832	5.69283	-4.91635
		2	0.476149	0.0886062	0.010132	-5.12433
		3	0.325733	0.1283	0.188982
		4	0.708454	0.00411018	0.020776	-5.73959
		5	0.303652	0.0721532	0.220245
		6	0.4521	0.0348278	0.0692854
		7	0.46185	0.0133356	0
	NR5A1 RUNX2 GATA4	1	0.41587	0.0834799	2.80486	-9.03656
		2	0.251042	0.305527	4.37144
		3	0.605302	0.0857387	0	-6.38155
		4	0.282887	0.289376	2.99435
		5	0.023197	0.419686	4.40254
		6	0.0537239	0.361451	5.29107
		7	0.144688	0.21245	5.02885	-9.76165
	No TFs	–	0.0154926	0.58181	0	0
	TFs	Clone	CD82+ FOXL2+ EPCAM–	EPCAM+	FSHR+
	NR5A1 RUNX1	1	0.243959	0.608678	0.0719099
		2	0.143291	0.81242	0.0306175
		3	0.131317	0.729675	0.0288642
		4	0.0677118	0.730361	0.00461915
		5	0.25742	0.524826	0.0315962
		6	0.707472	0.00425742	0
	NR5A1 RUNX2	1	0.188759	0.0604728	0
		2	0.245728	0.344849	0.00929352
		3	0.71713	0.0258465	0.000194126
		4	0.594678	0.00471129	3.76903e-05
		5	0.0766616	0.683707	0.0165889
		6	0.159567	0.778939	0.0269052
	NR5A1 RUNX1 TCF21	1	0.107656	0.691331	0.00930297
		2	0.130503	0.489509	0.00710734
		3	0.107948	0.530925	0.000279488
		4	0.0750566	0.876908	0.00731534
		5	0.0840575	0.777758	0.021064
		6	0.0761127	0.702589	9.02574e-05
	NR5A1 RUNX2 TCF21	1	0.185843	0.464699	0.00493429
		2	0.667043	0.129767	0.00252444
		3	0.0687157	0.565733	0.000500222
		4	0.121929	0.781312	0.0276267
		5*	0.0486193	0.888758	0.00271785
	No TFs	–	0.0675679	0.74394	0.0289313
