# Supplementary material for: Directed differentiation of human iPSCs to functional ovarian granulosa-like cells via transcription factor overexpression
Source: eLife. 2023 Feb 21;12:e83291. doi: 10.7554/eLife.83291 (PMC9943069; doi:10.7554/eLife.83291)
Supplement: Supplementary file 2. — This file contains the analyzed flow cytometry data from a preliminary optimization experiment, in which we performed our granulosa differentiation protocol on a polyclonal population of FOXL2-tdTomato reporter iPSCs with NR5A1 and RUNX1 expression vectors integrated. We tested three different basal media (DMEM–F12 + 10% KSR, aRPMI + B27, and mTeSR) and various additives (CHIR99021, FGF, TGF-beta, BMP4, and estradiol). We monitored expression of FOXL2-T2A-tdTomato, CD82, FSHR, and EpCAM. [file elife-83291-supp2.xlsx]

## Sheet: 2021-06-10_stats_singletfiltere
Media	CHIR_µM	FGF_ng_mL	TGF_ng_mL	BMP4_ng_mL	Estradiol_ng_mL	tdT_plus	CD82_plus	EPCAM_plus	FSHR_plus	APC-A	APC-Cy7-A	FSC-A	FSC-H	FSC-W	GFP-A	Indo-1 (Blue)-A	Live	PE-A	PE-Cy5-5-A	PE-Texas Red-A	PerCP-A	SSC-A	SSC-H	SSC-W	Time	single_cells	singlets
DMEM-KSR	0	0	0	0	0	0.044602	0.235899	0.256966	0.0187106	-384.924	9228.09	81640.9	73145.6	75248.2	81.1802	1710.69	TRUE	731.144	820.945	2341.69	2114.73	71599.6	58486.3	79629.3	6003.34	TRUE	TRUE
DMEM-KSR	0	0	1	0	0	0.0627552	0.282605	0.173542	0.0195946	-335.97	6161.76	87983.3	78861.7	74937.5	90.8577	1919.64	TRUE	767.222	1033.66	2505.22	2581.62	74417.9	60950.8	79338.6	5695.33	TRUE	TRUE
DMEM-KSR	0	100	0	0	0	0.0491188	0.302503	0.178641	0.0604282	-391.419	5601.48	92718.1	83226.7	74848.3	78.3607	1607.88	TRUE	792.871	1462.68	2577.63	3540.46	70016.4	57022.5	79825.6	5604.16	TRUE	TRUE
DMEM-KSR	0	100	1	0	0	0.0515023	0.377738	0.0819742	0.0306745	-434.769	2731.56	90773.1	81490.4	74969.7	83.3767	1708.2	TRUE	709.325	2077.21	2201.49	4892.46	73892.8	60372.8	79597.9	5608.42	TRUE	TRUE
DMEM-KSR	1.5	0	0	0	0	0.0390258	0.218194	0.151436	0.0198474	-284.115	6050.64	96974.1	86315.9	75636	86.0369	1994.73	TRUE	665.147	742.01	2072.86	1916.65	73210.5	59089	80499.9	5488.69	TRUE	TRUE
DMEM-KSR	1.5	0	1	0	0	0.0478946	0.216919	0.136433	0.0222941	-264.288	5108.17	92721.1	80883.2	77120.4	91.1907	1970.82	TRUE	731.11	771.904	2364.52	1986.44	72048.6	56693	82502.1	5452.74	TRUE	TRUE
DMEM-KSR	1.5	100	0	0	0	0.0342113	0.263395	0.0513598	0.0226772	-273.022	1944.38	100048	89247.7	75486.9	79.6641	1946.38	TRUE	655.385	1288.19	2008.86	3121.67	70810.7	57250	80430.2	5389.53	TRUE	TRUE
DMEM-KSR	1.5	100	1	0	0	0.0352577	0.317577	0.0375028	0.0241922	-298.253	1390.03	101667	90081.1	75887.7	82.0094	1952.18	TRUE	676.059	1531.83	2051.09	3667.39	75226.3	60521.1	80861.3	5278.29	TRUE	TRUE
DMEM-KSR	5	0	0	0	0	0.105373	0.313818	0.108251	0.0207712	-304.666	4267.06	99077.6	89001.7	74958	115.345	2617.41	TRUE	1039.24	1180.08	3736.4	2996.95	75685	61163.8	80329.9	5494.12	TRUE	TRUE
DMEM-KSR	5	0	1	0	0	0.100282	0.300846	0.0888044	0.0237424	-261.411	3488.24	93543.3	83621.2	75344.5	120.438	2554.03	TRUE	990.167	1069.95	3602.24	2739.23	73692.9	59849.3	79892.7	5558.2	TRUE	TRUE
DMEM-KSR	5	100	0	0	0	0.0850863	0.436088	0.0545632	0.0179744	-370.335	2108.81	95541.2	84037.1	76558.5	112.179	2332.1	TRUE	955.413	1857.67	3362.1	4541.48	75903.1	60633.9	81423.9	5411.23	TRUE	TRUE
DMEM-KSR	5	100	1	0	0	0.0981202	0.367702	0.0531188	0.0259185	-287.498	2023.47	99523	89186.3	75061.9	113.274	2580.55	TRUE	998.094	1463.99	3536.14	3615.58	76059.1	61993.3	79657.3	5377.99	TRUE	TRUE
iPSC_control	0	0	0	0	0	8.78426e-05	0.0246838	0.843728	8.78426e-05	-409.141	14086.7	73571.2	63171	79065.6	50.1247	997.917	TRUE	512.44	160.872	1224.63	603.476	75719.9	59373.3	82880	689.422	TRUE	TRUE
aRB27	0	0	0	0	0	0.00278657	0.081352	0.349955	0.00837359	-297.855	8442.96	73270.7	64876.9	76389.6	38.8768	1693.55	TRUE	365.468	341.17	821.252	964.534	55426.2	45226	79733.8	5563.89	TRUE	TRUE
aRB27	0	0	1	0	0	0.0033618	0.056881	0.381682	0.00365849	-299.727	8712.59	75119.3	65572.7	77429.6	43.4471	1680.75	TRUE	357.981	248.858	798.844	757.229	55914	45443.5	79995	5716.84	TRUE	TRUE
aRB27	0	100	0	0	0	0.00844568	0.130906	0.680261	0.00305867	-440.796	11896.3	75952.3	66505.5	77123.9	53.8603	1661.3	TRUE	484.883	554.994	1320.6	1506.47	59746.3	48667	79787.4	5769.9	TRUE	TRUE
aRB27	0	100	1	0	0	0.00817445	0.120629	0.651941	0.00387913	-440.631	12322.2	76623.1	67241.9	76765.4	54.5501	1633.74	TRUE	453.485	492.633	1200.47	1366.88	59401.3	48377.9	79756.3	5632.73	TRUE	TRUE
aRB27	1.5	0	0	0	0	0.00223555	0.0317515	0.0268423	0.0151973	-81.765	1014.89	48260.2	42808.1	75818.8	29.1146	1069.3	TRUE	336.941	188.314	806.565	544.302	42300.4	35456.1	77570.8	5658.79	TRUE	TRUE
aRB27	1.5	0	1	0	0	0.00221036	0.0316038	0.0172268	0.00996805	-78.8641	700.961	53665.2	47204.9	76563.3	28.4087	1228.12	TRUE	330.843	203.404	781.551	577.471	42614.2	35509.8	78086.9	5723.24	TRUE	TRUE
aRB27	1.5	100	0	0	0	0.00284674	0.0786491	0.0134454	0.00948856	-112.665	620.185	66213.1	58236	76591.4	27.7961	1490.65	TRUE	322.412	388.821	757.617	1003.91	41832.3	34920.5	77991.4	5829.82	TRUE	TRUE
aRB27	1.5	100	1	0	0	0.00268341	0.0877827	0.00989136	0.00792001	-116.339	463.491	66165.6	57969.1	76788.4	29.1729	1576.42	TRUE	349.784	440.285	870.652	1128.74	42486.5	35374.9	78190.5	5709.47	TRUE	TRUE
aRB27	5	0	0	0	0	0.0152432	0.260171	0.0418637	0.00426887	-241.71	1785.05	65798	58116.4	76558.2	50.906	1971.24	TRUE	395.337	993.945	993.36	2443.77	51858.6	42531	79215	5565.05	TRUE	TRUE
aRB27	5	0	1	0	0	0.0232786	0.225915	0.0673171	0.00572183	-241.829	2789.74	65795	58541.1	76029.8	53.7044	1953.1	TRUE	424.44	845.83	1131.46	2109.8	52470.8	43123	78930.8	5596.49	TRUE	TRUE
aRB27	5	100	0	0	0	0.00822375	0.234603	0.0319293	0.00457965	-226.086	1402.07	68431.4	60570.3	76391.1	53.6489	1919.57	TRUE	358.015	965.791	842.552	2383.44	51766.6	42595.2	79010.5	5393.95	TRUE	TRUE
aRB27	5	100	1	0	0	0.0213163	0.231848	0.0508094	0.00712763	-227.475	2138.93	68874.2	61166.3	76178	57.7177	1931.06	TRUE	419.948	881.55	1104.67	2202.38	53690.3	44166.5	78977	5405.03	TRUE	TRUE
mTeSR	0	mTeSR	mTeSR	0	0	0.00450919	0.0523801	0.725004	0.00288628	-403.987	12553.6	83922.4	71973.2	79215.1	53.6249	1125.25	TRUE	526.447	253.955	1482.31	822.451	59835.4	48320	80541.5	5661.39	TRUE	TRUE
mTeSR	0	mTeSR	mTeSR	0	1	0.00500819	0.0623054	0.698995	0.00355518	-382.49	11651.4	84485.5	72754.3	78789.4	53.8313	1005.22	TRUE	518.844	292.909	1438.86	897.771	59935.4	48759.4	79942.3	5689.53	TRUE	TRUE
mTeSR	0	mTeSR	mTeSR	100	0	0.0298724	0.141597	0.146444	0.0153813	-264.66	6285.01	78109.4	68661	77057.8	65.4525	1198.97	TRUE	555.185	562.128	1547.82	1488.42	65909.7	52973.1	80697.3	5341.35	TRUE	TRUE
mTeSR	0	mTeSR	mTeSR	100	1	0.0255612	0.152667	0.129617	0.018207	-256.027	5713.3	78866.1	69277.3	77149	62.9122	1187.61	TRUE	521.882	610.522	1412.71	1574.09	64409.9	51859.6	80574.3	5433.13	TRUE	TRUE
mTeSR	1.5	mTeSR	mTeSR	0	0	0.00336469	0.0974229	0.359574	0.0088353	-284.012	7229.11	98318	85133.2	77692.5	47.7613	1426.73	TRUE	431.953	446.5	1017.08	1206.19	64691.1	51340.4	81810.4	5490.53	TRUE	TRUE
mTeSR	1.5	mTeSR	mTeSR	0	1	0.00427269	0.100526	0.356198	0.00815218	-279.487	6985.57	98373.1	85280.7	77486.4	47.7623	1301.85	TRUE	432.833	464.12	1028.04	1237.57	63482.8	50868.4	81004.2	5575.36	TRUE	TRUE
mTeSR	1.5	mTeSR	mTeSR	100	0	0.0139746	0.158862	0.120978	0.0114588	-279.462	5832.09	77820.5	68837.9	76642	63.7574	1233.91	TRUE	414.024	678.121	988.173	1712.1	63195.5	51028.5	80379.1	5402.08	TRUE	TRUE
mTeSR	1.5	mTeSR	mTeSR	100	1	0.0110354	0.160549	0.124352	0.0125261	-281.651	5977.43	83795.5	74632.3	76056.9	61.2891	1251.38	TRUE	390.821	687.064	911.951	1731.08	61581.6	50044.2	79882.6	5137.95	TRUE	TRUE
mTeSR	5	mTeSR	mTeSR	0	0	0.00222778	0.0706159	0.00884677	0.0104989	-101.451	395.354	63384.9	54817.2	78207.5	33.9851	1457.6	TRUE	407.508	388.104	1088.94	1009.51	44892	36671.7	79746.5	5729.75	TRUE	TRUE
mTeSR	5	mTeSR	mTeSR	0	1	0.00305937	0.0776972	0.00915403	0.00880401	-109.13	410.846	67470.1	58558.2	77832.2	34.1146	1403	TRUE	415.593	421.406	1123.16	1083.8	44313.9	36447.2	79222.5	5663.91	TRUE	TRUE
mTeSR	5	mTeSR	mTeSR	100	0	0.0131766	0.197175	0.124592	0.00882164	-323.427	6121.51	77420.7	68434.5	76597.1	65.3066	1423.12	TRUE	362.026	863.668	817.301	2134.05	60671.4	49119.3	80121.3	5499.21	TRUE	TRUE
mTeSR	5	mTeSR	mTeSR	100	1	0.0118251	0.197947	0.144898	0.0108807	-339.652	7227.15	85024.2	75617.6	75975.8	65.3259	1481.47	TRUE	359.86	824.723	823.637	2057.54	60757.4	49429.8	79749.9	5391.74	TRUE	TRUE
